# Supplementary material for: “I’m still here and I want them to know that”: experiences of chemists with concealable identities in undergraduate research
Source: Royal Society of Chemistry journal article supplement (doi:10.1039/d4rp00094c), 2024-09-06
Supplement: d4rp00094c2.pdf [file d4rp00094c2.pdf]

## Interview Protocol

This interview protocol is intended to be semi-structured, as participants mention topics of interest, feel free to ask them to expand or to ask additional follow-up questions.

### All students:

Confirm IRB consent, ask pseudonym and design research icon

### Students who have **NOT yet** participated in in research:

1. What is research?
2. What research experiences are open for undergraduates to participate in?
3. What are the costs and benefits you perceive for participating in undergraduate research experiences?
4. Have you participated in research as an undergraduate?  
*(4.1) IF YES: Clarify the discrepancy from pre-survey and switch to the protocol for students who have participated in research.*
5. Do you plan on participating in undergraduate research before you graduate?
6. Have you heard about research opportunities? How have you heard about them?  
*(6.1) IF YES: Why didn't you participate in the research opportunities?*
7. I have listed that you responded on the survey that you identify as [Read off identities], did any of these things affect your participation in research?
9. Was there anything that hindered your ability to participate in undergraduate research experiences?  
*(9.1) IF YES: How large of a barrier was this for you to overcome?*
10. Is there anything about your college experience that you feel had an impact on your ability to participate in research? (Exs: Student athlete, transfer student, had to work, etc)
10. What are your future/career goals?
11. Do you think undergraduate research experiences would help you achieve your future/career goals?
12. Are there any changes you wish the department or university would make regarding recruitment into research experiences?
13. Is there anything else you would like to share with us?

### Students who have participated in in research:

1. What is research?
2. What research experiences are open for undergraduates to participate in?

3. What are the costs and benefits you perceive for participating in undergraduate research experiences?
4. Have you participated in research as an undergraduate?  
*(4.1) If NO: Clarify the discrepancy from pre-survey and switch to the protocol for students who have not yet participated in research.*  
*(4.1) If YES: Tell me about any of these research experiences.*
5. How did you find out about the research experiences you participated in?
6. What influenced your decision to participate OR not participate in a research experience?
7. I have listed that you responded on the survey that you identify as [Read off identities], did any of these things affect your participation in research?
8. Was there anything that hindered your ability to participate in undergraduate research experiences?  
*(8.1) If YES: If so, how large of a barrier was this for you to overcome?*
9. Is there anything about your college experience that you feel had an impact on your ability to participate in research? (Exs: Student athlete, transfer student, had to work, etc)
10. What are your future/ career goals?
11. Has undergraduate research changed your future/ career goals from what they were before you started?
12. Do you plan on pursuing any future research positions?
13. Is there anything about undergraduate research you wish you had been told beforehand? Any changes you wish the department or university would make regarding recruitment into research experiences?
14. Is there anything else you would like to share with us regarding your entry into undergraduate research experiences?

All students:

Turn off recording and explain incentive information (as applicable).
